# Supplementary material for: An amazing new Capsicum (Solanaceae) species from the Andean-Amazonian Piedmont
Source: PhytoKeys. 2020 Nov 20;167:13–29. doi: 10.3897/phytokeys.167.57751 (PMC7695674; doi:10.3897/phytokeys.167.57751)
Supplement: Supplementary material 1 — Table S1. Taxa and materials analyzed in the phylogenetic analyses [file phytokeys-167-013-s001.xls]

## Sheet: Hoja1
Table S1. Taxa and materials analyzed in the phylogenetic analyses. Position within Capsicum (clade) or as outgroup, provenance, voucher specimens, ID in trees, and GenBank accession numbers for each marker analyzed are provided. Sequences retrieved from GenBank are marked with an asterisk. Abbreviations. CGN = Centre for Genetic Resources, Wageningen University, NL. NMCA = College of Agriculture…
Clade	Species	Voucher	Origin	Tree ID	psbA-trnH	ndhF-rpl32	trnL-trnF	waxy
Andean	Capsicum dimorphum (Miers) Kuntze	Orozco 3863 (CORD)	Colombia: Cauca, Munchique	1	MH746985*	MH881728*	MH747063*	MH881753*
Andean		Orozco 3865 (CORD)	Colombia: Cundinamarca	2	KP747394*	MH881729*	MH747064*	KP747338*
Andean	Capsicum geminifolium (Dammer) Hunz.	Orozco 3922 (CORD)	Ecuador: Zamora-Chinchipe	1	KP747391*	MH881714*	MH747049*	KP747335*
Andean		Barboza & Leiva 4845 (CORD)	Ecuador: Zamora-Chinchipe, E. Biológica San Francisco	2	MH746978*	MH881717*	MH747052*	MH881746*
Andean	Capsicum hookerianum (Miers) Kuntze	Barboza & Leiva 4831 (CORD)	Ecuador: Loja, Macará-Sapotillo, Km 10		MH746984*	MH881727*	MH747062*	MH881752*
Andean	Capsicum lanceolatum (Greenm.) C.V. Morton& Standl.	Carrizo García 73 (WU)	Austria: Vienna (cult. from seeds from Semillas La Palma, Spain)		MH746982*	MH881723*	MH747058*	MH881750*
Andean	Capsicum longifolium Barboza & S. Leiva	Barboza & Leiva 4851 (CORD)	Ecuador: Zamora-Chinchipe, E. Biológica San Francisco	1	MH746986*	MH881731*	MH747065*	MH881754*
Andean		Barboza & Leiva 4846 (CORD)	Ecuador: Zamora-Chinchipe, E. Biológica San Francisco	2	MH746987*	MH881732*	MH747066*	MH881755*
Andean	Capsicum lycianthoides Bitter	Beltrán & Barboza 85 (COL)	Colombia: Quindío, Circasia		KP747389*	MH881718*	MH747053*	KP747333*
Andean	Capsicum piuranum Barboza & S. Leiva	Barboza & Leiva 4841 (CORD)	Peru: Piura, Huancabamba		MH746981*	MH881721*	MH747056*	MH881749*
Andean	Capsicum regale Barboza & Bohs	Orejuela et al. 3034 (COL)	Colombia: Caquetá, Correg. El Caraño		MT832295	MT832300	MT832301	MT856658
Andean	Capsicum rhomboideum (Dunal) Kuntze	Carrizo García 97 (WU)	Argentina: Córdoba, Córdoba (cult., seeds from Venezuela: Táchira, San Cristóbal)	1	EF537238*	MH881725*	MH747060*	EF537147*
Andean		Barboza & Leiva 4854 (CORD)	Ecuador: Tungurahua, Baños	2	MH746983*	MH881726*	MH747061*	MH881751*
Annuum	Capsicum annuum L. var. glabriusculum (Dunal) Heiser & Pickersgill	NMCA 10983	USA: Texas, New México (cult.)		EF537249*	KR078311.1*	KR078311.1*	EF537162*
Annuum	Capsicum galapagoense Hunz.	Carrizo García 72 (WU)	Austria: Vienna (cult. from seeds from CGN, AC 1501)		MH746965*	MH881694*	MH747029*	MH881734*
Atlantic Forest	Capsicum mirabile Mart.	Barboza & Carrizo García 3632 (CORD)	Brazil: São Paulo, Campos do Jordão		KP747383*	MH881709*	MH747044*	KP747327*
Atlantic Forest	Capsicum recurvatum Witasek	Barboza 1632 (CORD)	Brazil: Paraná, Morretes		MH746975*	MH881711*	MH747046*	KP747347*
Atlantic Forest	Capsicum schottianum Sendtn.	Barboza & Carrizo García 3637 (CORD)	Brazil: São Paulo, Paranapiacaba		KP747384*	MH881710*	MH747045*	KP747328*
Baccatum	Capsicum chacoense Hunz.	Carrizo García & Fernández 47 (CORD)	Argentina: Tucumán, Río Vipos		MH746966*	MH881695*	MH747030*	MH881735*
Bolivian	Capsicum caballeroi M. Nee	Barboza et al. 4907 (CORD)	Bolivia: Santa Cruz, Siberia		MH746972*	MH881704*	MH747039*	MH881741*
Bolivian	Capsicum minutiflorum (Rusby) Hunz.	Carrizo García 77 (WU)	Bolivia: Santa Cruz, Bermejo		MH746970*	MH881702*	MH747037*	MH881739*
Bolivian	Capsicum neei Barboza & X. Reyes	Barboza et al. 4927 (CORD)	Bolivia: Chuquisaca, Monteagudo		MH746974*	MH881708*	MH747043*	MH881743*
Caatingae	Capsicum caatingae Barboza & Agra	Agra & Barboza 7085 (CORD)	Brazil: Paraíba, Morro do Quixaba		KP747386*	MH881713*	MH747048*	KP747330*
Flexuosum	Capsicum flexuosum Sendtn.	Barboza et al. 1034 (CORD)	Argentina: Misiones, Guaraní		KP747375*	MH881712*	MH747047*	KP747319*
Pubescens	Capsicum pubescens Ruiz & Pav.	Carrizo García 28 (CORD)	Bolivia: La Paz, Chulumani		KP747369*	MH881698*	MH747033*	KP747313*
Purple corolla	Capsicum cardenasii Heiser & Smith	Carrizo García 76 (WU)	Austria: Vienna (cult. from seeds from Bolivia: La Paz, La Paz, street market)		MH746969*	MH881699*	MH747035*	KP747310*
Purple corolla	Capsicum eximium Hunz.	Moscone & Neumann 216 (CORD)	Argentina: Salta, Salta		KP747394*	MH881700*	MH747035*	KP747338*
Tovarii	Capsicum tovarii Eshbaugh, P.G. Sm. & Nickrent	Carrizo García 74 (WU)	Austria: Vienna (cult. from seeds from CGN, PI 606708/NMCA 90008)		MH746968*	MH881697*	MH747032*	MH881737*
Outgroup	Dunalia brachyacantha Miers	Barboza et al. 3653 (CORD)	Bolivia: Santa Cruz, El Empalme		KP747398*	KP308151.1*	KP308151.1*	KP747342*
Outgroup	Jaltomata bicolor (Ruiz & Pav.) Mione	Barboza et al. 3388 (CORD)	Peru: Lima, Canta		KP747400*	MT832297	MT832299	KP747344*
Outgroup	Lycianthes lycioides (L.) Hassl.	Barboza & Leiva 3937 (CORD)	Peru: Cuzco		KP747396*	MT832296	MT832298	KP747340*
Outgroup	Lycianthes rantonnetii (Carrière) Bitter	Carrizo García 29 (CORD)	Argentina: Córdoba, Córdoba (cult., origin unknown)		EF537251*	MH881733*	MH747067*	EF537148*
